# Supplementary material for: Prevalence and pattern of waterborne parasitic infections in eastern Africa: A systematic scoping review
Source: PubMed Central journal article supplement (PMC7508703; doi:10.1016/j.fawpar.2020.e00089), 2020-09-08
Supplement: mmc1.pdf [file mmc1.pdf]

**Appendix A:** Search strategy used during literature review on waterborne parasitic diseases in eastern Africa.

|                                                                                                                                                                                                                                                                                                                                                                                                                                                                                                                                                                                                                                                                |                                                                                                                                                                                                                                                                                                                                                                                                                                                                                                                                                                                                                                                                                                                                                                                                                                                                                                                                                                                                                |
|----------------------------------------------------------------------------------------------------------------------------------------------------------------------------------------------------------------------------------------------------------------------------------------------------------------------------------------------------------------------------------------------------------------------------------------------------------------------------------------------------------------------------------------------------------------------------------------------------------------------------------------------------------------|----------------------------------------------------------------------------------------------------------------------------------------------------------------------------------------------------------------------------------------------------------------------------------------------------------------------------------------------------------------------------------------------------------------------------------------------------------------------------------------------------------------------------------------------------------------------------------------------------------------------------------------------------------------------------------------------------------------------------------------------------------------------------------------------------------------------------------------------------------------------------------------------------------------------------------------------------------------------------------------------------------------|
| <p><b>(a) Database:</b> PubMed</p> <p><b>(b) Date of search:</b> 25<sup>th</sup> March 2020.</p> <p><b>(c) Limits:</b> 1<sup>st</sup> January 1941 to 31<sup>st</sup> December 2019</p>                                                                                                                                                                                                                                                                                                                                                                                                                                                                        |                                                                                                                                                                                                                                                                                                                                                                                                                                                                                                                                                                                                                                                                                                                                                                                                                                                                                                                                                                                                                |
| <p><b>(d) Regional level search terms:</b></p> <p>Medical Subject Headings (MeSH) of the following terms and their entry terms (shown in bullets):</p> <p><u>Waterborne Diseases</u></p> <ul style="list-style-type: none"> <li>• Disease, Waterborne</li> <li>• Diseases, Waterborne</li> <li>• Waterborne Disease</li> <li>• Water-related Diseases</li> <li>• Disease, Water-related</li> <li>• Diseases, Water-related</li> <li>• Water related Diseases</li> <li>• Water-related Disease</li> </ul> <p><u>Parasitology [Subheading]</u></p> <ul style="list-style-type: none"> <li>• protozoology</li> <li>• protozoa</li> <li>• helminthology</li> </ul> | <p><b>(e) Search 1 - Regional level</b></p> <ol style="list-style-type: none"> <li>1) <u>Waterborne Diseases</u> [MeSH] (2205 items)</li> <li>2) Disease, Waterborne (3228 items)</li> <li>3) Diseases, Waterborne (2205 items)</li> <li>4) Waterborne Disease (3228 items)</li> <li>5) Water-related Diseases (9212 items)</li> <li>6) Disease, Water-related (11507 items)</li> <li>7) Diseases, Water-related (9212 items)</li> <li>8) Water-related Disease (11507 items)</li> <li>9) <u>Parasitology</u> [MeSH] (222421 items)</li> <li>10) Protozoology (222939 items)</li> <li>11) Protozoa (230542 items)</li> <li>12) Helminthology (222682 items)</li> <li>13) Parasites (258933 items)</li> <li>14) <u>Africa, Eastern</u> [MeSH] (68227 items)</li> <li>15) East Africa (79005 items)</li> <li>16) Eastern Africa (68227 items)</li> <li>17) British Indian Ocean Territory (68238 items)</li> <li>18) <u>Prevalence</u> [MeSH] (2703772 items)</li> <li>19) Prevalences (694815 items)</li> </ol> |

|                                                                                    |                                                                                         |
|------------------------------------------------------------------------------------|-----------------------------------------------------------------------------------------|
| <ul style="list-style-type: none"> <li>• parasites</li> </ul>                      | <p>20) <u>Incidence</u> [MeSH] (2868467 items)</p> <p>21) Incidences (851690 items)</p> |
| <p><u>Africa, Eastern</u></p>                                                      | <p>22) <u>Morbidity</u> [MeSH] (2714314 items)</p>                                      |
| <ul style="list-style-type: none"> <li>• East Africa</li> </ul>                    | <p>23) Morbidities (883070 items)</p>                                                   |
| <ul style="list-style-type: none"> <li>• Eastern Africa</li> </ul>                 | <p>24) 1 OR 2 OR 3 OR 4 OR 5 OR 6 OR 7 OR 8 (16615 items)</p>                           |
| <ul style="list-style-type: none"> <li>• British Indian Ocean Territory</li> </ul> | <p>25) 9 OR 10 OR 11 OR 12 OR 13 (266652 items)</p>                                     |
|                                                                                    | <p>26) 14 OR 15 OR 16 OR 17 (79014 items)</p>                                           |
|                                                                                    | <p>27) 18 OR 19 OR 20 OR 21 OR 22 OR 23.( 3370880 items)</p>                            |
| <p><u>Prevalence</u></p>                                                           | <p>28) 24 AND 25 AND 26 AND 27 (<b>54 items</b>)</p>                                    |
| <ul style="list-style-type: none"> <li>• Prevalences</li> </ul>                    | <p>With filters below (<b>46 items</b>)</p>                                             |
|                                                                                    |                                                                                         |
| <p><u>Incidence</u></p>                                                            | <p>Filters:</p>                                                                         |
| <ul style="list-style-type: none"> <li>• Incidences</li> </ul>                     | <p><b>Article types:</b></p>                                                            |
|                                                                                    | <ul style="list-style-type: none"> <li>• Clinical Study</li> </ul>                      |
|                                                                                    | <ul style="list-style-type: none"> <li>• Clinical Trial</li> </ul>                      |
| <p><u>Morbidity</u></p>                                                            | <ul style="list-style-type: none"> <li>• Review</li> </ul>                              |
| <ul style="list-style-type: none"> <li>• Morbidities</li> </ul>                    | <ul style="list-style-type: none"> <li>• Systematic Reviews</li> </ul>                  |
|                                                                                    |                                                                                         |
|                                                                                    |                                                                                         |
|                                                                                    | <p><b>Publication date:</b></p>                                                         |
|                                                                                    | <p>January 1, 1941. The first country (Ethiopia) got independence May</p>               |
|                                                                                    | <p>5, 1941.</p>                                                                         |
|                                                                                    |                                                                                         |
|                                                                                    | <p><i>Overall regional level model (step 28) in details</i></p>                         |
|                                                                                    | <p>((((((((((((Waterborne Diseases) OR Disease, Waterborne) OR</p>                      |
|                                                                                    | <p>Diseases, Waterborne) OR Waterborne Disease) OR Water-related</p>                    |
|                                                                                    | <p>Diseases) OR Disease, Water-related) OR Diseases, Water-related)</p>                 |
|                                                                                    |                                                                                         |



|                                                                                                                                                                                                                                                                                                                                                                                                                                                                                                                                                                                                                                                                                                                                                                                                                                                                                          |                                                                                                                                                                                                                                                                                                                                                                                                                |
|------------------------------------------------------------------------------------------------------------------------------------------------------------------------------------------------------------------------------------------------------------------------------------------------------------------------------------------------------------------------------------------------------------------------------------------------------------------------------------------------------------------------------------------------------------------------------------------------------------------------------------------------------------------------------------------------------------------------------------------------------------------------------------------------------------------------------------------------------------------------------------------|----------------------------------------------------------------------------------------------------------------------------------------------------------------------------------------------------------------------------------------------------------------------------------------------------------------------------------------------------------------------------------------------------------------|
| <p><u>Kenya</u> [MeSH]</p> <ul style="list-style-type: none"> <li>• Republic of Kenya</li> </ul> <p><u>Tanzania</u> [MeSH]</p> <ul style="list-style-type: none"> <li>• United Republic of Tanzania</li> <li>• Zanzibar</li> <li>• Tanganyika</li> </ul> <p><u>Rwanda</u> [MeSH]</p> <ul style="list-style-type: none"> <li>• Republic of Rwanda</li> <li>• Ruanda</li> </ul> <p><u>Burundi</u> [MeSH]</p> <ul style="list-style-type: none"> <li>• Urundi</li> <li>• Republic of Burundi</li> </ul> <p><u>Madagascar</u> [MeSH]</p> <ul style="list-style-type: none"> <li>• Malagasy Republic</li> </ul> <p><u>Comoros</u> [MeSH]</p> <ul style="list-style-type: none"> <li>• Iles Comores</li> <li>• Comoro Islands</li> <li>• Mayotte</li> </ul> <p><u>Mauritius</u> [MeSH]</p> <ul style="list-style-type: none"> <li>• Agalega Islands</li> </ul> <p><u>Seychelles</u> [MeSH]</p> | <p>(((((Parasitology) OR protozoology) OR protozoa) OR helminthology) OR parasites)))= <b>44 items</b></p> <p><b>(h) After removal of overlaps [merging (e) with (g)] = 52 items</b></p> <p><b>(i) After removal of ineligible articles [from (h)] = 16 items</b></p> <p><b>(j) Articles searched from reference lists of the 16 articles = 10 items</b></p> <p>Thus a total of 26 articles were reviewed.</p> |
|------------------------------------------------------------------------------------------------------------------------------------------------------------------------------------------------------------------------------------------------------------------------------------------------------------------------------------------------------------------------------------------------------------------------------------------------------------------------------------------------------------------------------------------------------------------------------------------------------------------------------------------------------------------------------------------------------------------------------------------------------------------------------------------------------------------------------------------------------------------------------------------|----------------------------------------------------------------------------------------------------------------------------------------------------------------------------------------------------------------------------------------------------------------------------------------------------------------------------------------------------------------------------------------------------------------|
