# Supplementary material for: Prevalence and pattern of waterborne parasitic infections in eastern Africa: A systematic scoping review
Source: PubMed Central journal article supplement (PMC7508703; doi:10.1016/j.fawpar.2020.e00089), 2020-09-08
Supplement: mmc2.pdf [file mmc2.pdf]

**Appendix B.** Characteristics of studies reviewed on prevalence and pattern of waterborne parasitic infections in eastern Africa. 2019.

| Article S/No. | Study country | Study year | Study population and sample size | Parasite(s)/Disease(s) studied                                                                                                                                                                                   | Diagnostic test | Prevalence estimates (%), otherwise, stated | Reference        |
|---------------|---------------|------------|----------------------------------|------------------------------------------------------------------------------------------------------------------------------------------------------------------------------------------------------------------|-----------------|---------------------------------------------|------------------|
| 1             | BURUNDI       |            | General population               | <i>Schistosoma mansoni</i>                                                                                                                                                                                       | Kato-Katz       | 17, 19, 26, 33<br>four areas                | Gryseels 1991    |
| 2             | ETHIOPIA      | 2015/2016  | 323                              | <i>Entamoeba histolytica</i> /dispar trophozoite<br><i>E. histolytica</i> /dispar cyst<br><i>Giardia lamblia</i> trophozoite<br><i>G. lamblia</i> cyst<br><i>Cryptosporidium parvum</i><br><i>Isospora belli</i> |                 | 7.1<br>4.6<br>4.8<br>0.6<br>5.9<br>2.8      | Gedle et al.2017 |

|   |  |           |                                     |                                                               |           |              |                             |
|---|--|-----------|-------------------------------------|---------------------------------------------------------------|-----------|--------------|-----------------------------|
| 3 |  | 2009/2011 | 520 HIV/AIDS patients               | <i>Cryptosporidium parvum</i>                                 | PCR-RFLP  | 26.9         | Adamu et al., 2014          |
| 4 |  | 2011/2012 | 371 family members                  | <i>Schistosoma mansoni</i>                                    | Kato-Katz | 73.9         | Abebe et al., 2014          |
| 5 |  |           | Village-to-village search for cases | Dracunculiasis                                                |           | 21 cases     | Jemaneh and Tatischeff 1993 |
| 6 |  |           | 311 banana plantation residents     | <i>Schistosoma mansoni</i><br><i>Entamoeba histolytica</i>    |           | 1.9<br>0.6   | Wondimagegnehu et al., 1992 |
| 7 |  | 2018      | 561 under-five children             | <i>Entamoeba histolytica/dispar</i><br><i>Giardia lamblia</i> |           | 15.3<br>10.2 | Gadisa and Jote 2019        |
| 8 |  | 2016      | Schoolchildren                      | <i>Entamoeba histolytica/dispar</i><br><i>Giardia lamblia</i> |           | 5.21<br>4.69 | Sisay and Lemma 2019        |
| 9 |  | 2017      | 597 school-aged children            | <i>Schistosoma mansoni</i>                                    | Kato-Katz | 12.9         | Shumbej and Girum 2019      |

|    |       |           |                          |                                                                                                                                    |                            |                                      |                          |
|----|-------|-----------|--------------------------|------------------------------------------------------------------------------------------------------------------------------------|----------------------------|--------------------------------------|--------------------------|
| 10 |       | 2008      | 491 adult participants   | Schistosomiasis                                                                                                                    | Stool exam                 | 41.3                                 | Nyantekyi et al., 2014   |
| 11 |       | 2015      | 374 schoolchildren       | <i>Schistosoma mansoni</i><br>Soil-transmitted helminths<br><i>Ascaris lumbricoides</i><br><i>Trichuris trichiura</i><br>Hookworms | Formol-ether concentration | 31%<br>52.4%<br>44.4%<br>11%<br>7.7% | Tadege and Shimelis 2017 |
| 12 |       | 2015      | 302 School-aged children | Soil-transmitted helminths<br><i>Ascaris lumbricoides</i><br><i>Trichuris trichiura</i>                                            | Kato-Katz                  | 41.7%.<br><br>19.8%<br>15.6%         | Emana et a., 2015        |
| 13 |       |           | 393 schoolchildren       | <i>Giardia duodenalis</i><br><i>Cryptosporidium</i> spp                                                                            | RT-PCR                     | 55%<br>4.6%                          | De Lucio et al., 2016    |
| 14 |       | 2001-2016 | National                 | Malaria                                                                                                                            |                            | 4.31% to 2.9%                        | Taffese et al., 2018     |
| 15 | KENYA | 2012/2014 | Pre-school aged children | <i>Schistosoma mansoni</i>                                                                                                         | Kato-Katz                  | 18%                                  | Won et al., 2017         |

|    |  |      |                                  |                                                                                                                  |                                                         |                                         |                       |
|----|--|------|----------------------------------|------------------------------------------------------------------------------------------------------------------|---------------------------------------------------------|-----------------------------------------|-----------------------|
|    |  |      | 3612 samples                     |                                                                                                                  | Antibody response                                       | 50%                                     |                       |
| 16 |  |      | 285 HIV patients                 | <i>Entamoeba histolytica/dispar</i><br><br><i>Giardia lamblia</i><br><br><i>Entamoeba coli</i>                   | Fresh stool wet mounts; Modified ZN; Formol-ether conc. | 58.3<br><br>16.6<br><br>5.9             | Kipyegen et al., 2012 |
| 17 |  | 2001 | 1246 children<br><br>10–12 years | <i>Schistosoma mansoni</i>                                                                                       | Kato-Katz                                               | 16.3                                    | Handzel et al., 2003  |
| 18 |  | 2012 | 4931 all age                     | Soil-transmitted helminths<br><br>Hookworms<br><br><i>Ascaris lumbricoides</i><br><br><i>Trichuris trichiura</i> | Kato-Katz                                               | 32.7<br><br>16.7<br><br>17.9<br><br>6.1 | Freeman et al., 2015  |
| 19 |  | 2012 | 21528 school                     | Soil-transmitted                                                                                                 | Kato Katz                                               | 32.4                                    | Mwandawiro et al.,    |

|    |        |      |                                     |                                                                                                                                                                             |              |                                                    |                              |
|----|--------|------|-------------------------------------|-----------------------------------------------------------------------------------------------------------------------------------------------------------------------------|--------------|----------------------------------------------------|------------------------------|
|    |        |      | children                            | helminths<br>Hookworms<br><i>A. lumbricoides</i><br><i>T. trichiura</i><br><i>S. mansoni</i><br><i>S. haematobium</i>                                                       |              | 15.6<br>18.0<br>6.6<br>2.1<br>14.8                 | 2013                         |
| 20 |        |      | 692 pre-school &<br>school children | Soil transmitted<br>helminths<br><i>Ascaris spp.</i><br><i>Trichuris spp.</i><br>Hookworm                                                                                   | Kato Katz    | 40.5 & 40.7<br>24.1 & 22.7<br>24.0 & 28.8<br>< 0.1 | Davis, et al. 2014           |
| 21 | RWANDA | 2010 | 109 students<br><br>Among infected: | Intestinal parasites<br><i>E. histolytica</i><br><i>Trichomonas intestinalis</i><br>and <i>A. lumbricoides</i><br><i>Giardia duodenalis</i><br><i>Ancylostoma duodenale</i> | Saline smear | 50.5<br>54.5<br>20<br>3.6<br>1.8                   | Niyizurugero et al.,<br>2013 |

|    |          |           |                                    |                                                                     |                               |                        |                            |
|----|----------|-----------|------------------------------------|---------------------------------------------------------------------|-------------------------------|------------------------|----------------------------|
| 22 |          | 2014/2015 | Two districts                      | Intestinal worms and parasites in general                           |                               | 9997 cases             | Stone and Ndagijimana 2018 |
| 23 | SUDAN    |           | 300 <5-year children               | Giardiasis<br><i>Entamoeba histolytica</i><br><i>Entamoeba coli</i> | Stool exam                    | 21.1<br>0.7<br>2.7     | Karrar and Rahim 1995      |
| 24 |          | 2002      | National estimate                  | Malaria                                                             | Hospital data<br>+ simulation | 9 million episodes     | Abdalla 2007               |
| 25 | TANZANIA | 2009      | 388 adult population               | <i>Schistosoma mansoni</i>                                          | Abdominal ultrasound          | 42.2                   | Kaatano et al., 2015       |
| 26 |          | 1996      | Schoolchildren<br>284, 350         | Schistosomiasis<br>• Urinary<br>• Intestinal                        |                               | 37, 86.3<br>22.9, 43.5 | Poggensee et al., 2004     |
| 27 |          | 2010/2011 | 185 humans<br>around national park | <i>Cryptosporidium spp.</i>                                         |                               | 4.3                    | Parsons et al., 2015       |
| 28 |          | 2015/2016 | 2000 households                    | Malaria                                                             | Blood slide                   | 13%                    | Khatib et al., 2018        |

|    |         |           | randomly selected                           |                                | microscopy         |                                |                          |
|----|---------|-----------|---------------------------------------------|--------------------------------|--------------------|--------------------------------|--------------------------|
| 29 | UGANDA  |           | 642 people                                  | <i>Schistosoma mansoni</i>     | Stool exam         | 81.6 (males)<br>81.3 (females) | Kabatereine et al., 1992 |
| 30 |         |           | 446 > 6 years old people                    | <i>Schistosoma mansoni</i>     | Modified Kato-Katz | 88.6                           | Tukahebwa et al., 2013   |
| 31 |         | 1996/1997 | Fishing community                           | <i>Schistosoma mansoni</i>     |                    | 72                             | Kabatereine et al., 2004 |
| 32 |         |           | 301 patients presenting with clinical signs | <i>Entamoeba histolytica</i>   | Routine microscopy | 19.93%                         | Ekou et al., 2012        |
| 33 |         | 2007      | 108 people living near national park        | <i>Giardia duodenalis</i>      | Stool RT-PCR       | 40.7%                          | Johnston et al., 2010    |
| 34 | SOMALIA |           | General population in two localities        | Schistosomiasis (urinary)      |                    | 27.2% and 58.1%                | Arfaa F 1975             |
| 35 |         |           | Farmers from many parts                     | <i>Schistosoma haematobium</i> |                    | 65.8%, 48.9% and 60.;7%        | Koura et al., 1981       |

|    |            |      |                                                           |                                                                                                         |           |                                   |                                |
|----|------------|------|-----------------------------------------------------------|---------------------------------------------------------------------------------------------------------|-----------|-----------------------------------|--------------------------------|
| 36 |            |      | Two institutions                                          | Soil-transmitted<br>helminths or protozoa                                                               |           | About 85%                         | Ilard et al., 1987             |
| 37 | MAURITIUS  |      | 50 schools                                                | <i>Schistosoma</i><br><i>haematobium</i>                                                                |           | 15% - >50%                        | Cowper 1953                    |
| 38 | ERITREA    |      | Country average                                           | <i>Schistosoma mansoni</i>                                                                              |           | 2.4%                              | Ministry of Education,<br>2002 |
| 39 |            |      | Country average                                           | <i>Schistosoma mansoni</i>                                                                              |           | 5%                                | Lai et al., 2015               |
| 40 |            |      | 75 vegetable<br>farmers using<br>wastewater<br>irrigation | Giardiasis                                                                                              |           | 45%                               | Srikanth amd Naik<br>2004      |
| 41 | MADAGASCAR | 2015 | 1958 school-age<br>children                               | <i>Schistosoma</i><br><i>haematobium</i><br><i>Schistosoma mansoni</i><br>Soil-transmitted<br>helminths | Kato-Katz | 30.5 %<br><br>5.0 %<br><br>4.7 %. | Rasoamanahaja et al.,<br>2016  |



|    |           |           |                         |                                                                                                                                   |                                                                          |                |                           |
|----|-----------|-----------|-------------------------|-----------------------------------------------------------------------------------------------------------------------------------|--------------------------------------------------------------------------|----------------|---------------------------|
| 42 |           |           | 399 school-age children | <i>Schistosoma haematobium</i><br><br><i>Schistosoma mansoni</i>                                                                  | Urine filtration<br><br>Circulating cathodic antigen (CCA) and Kato-Katz | 0<br><br>93.7% | Spencer et al., 2017      |
| 43 |           | 1999-2017 | Eritrean migrants       | Malaria                                                                                                                           | Hospital records                                                         | 146 cases      | Schlagenhauf et al., 2018 |
| 44 | SEYCHELES | 1988      |                         | <i>T trichiura</i> ,<br>Hookworms<br><i>Ascaris lumbricoides</i> ,<br><i>Giardia intestinalis</i><br><i>Entamoeba histolytica</i> | 84%<br>22%<br>8%<br>6%<br>5%                                             |                | Kitua et al., 1988        |
| 45 |           |           |                         | <i>Ascaris lumbricoides</i><br><br><i>Trichuris trichiura</i>                                                                     | 17.7%<br><br>53.3%                                                       |                | Albonico et al., 1996     |

|    |          |           |                                      |                                  |            |                           |                              |
|----|----------|-----------|--------------------------------------|----------------------------------|------------|---------------------------|------------------------------|
|    |          |           |                                      | Hookworms                        | 6.3%       |                           |                              |
|    |          |           |                                      | <i>Strongyloides stercoralis</i> | 1.1%       |                           |                              |
|    |          |           |                                      | <i>Entamoeba histolytica</i>     | 4.6%       |                           |                              |
|    |          |           |                                      | <i>Giardia intestinalis</i>      | 3.3%       |                           |                              |
| 46 |          | 2010-2016 | Hospital<br>uncomplicated<br>malaria | Malaria                          | 1.4 - 2.0% |                           | Ihantamalala et al.,<br>2018 |
| 47 | DJIBOUTI | 1998-2009 | Hospital febrile<br>cases            | Malaria                          | <5%        | Blood slide<br>microscopy | Ollivier et al., 2011        |
